# Supplementary material
Source: publisher figshare collection journal article supplement (https://tandf.figshare.com/ndownloader/files/33980922)
Supplement: Supplementary file 1 [file 33980922]

**SUPPLEMENTARY MATERIALS FOR:**

**Rare earth elements in the Iron-oxide Apatite (IOA) Deposit: Insights from Apatite**

Shengchao Yan1,2*, Wei Liu1,2

1. State key Laboratory of Lithospheric Evolution, Institute of Geology and Geophysics, Chinese Academy of Sciences, Beijing 100029, China

2. University of Chinese Academy of Sciences, Beijing 100049, China

*Email：yansc@mail.iggcas.ac.cn


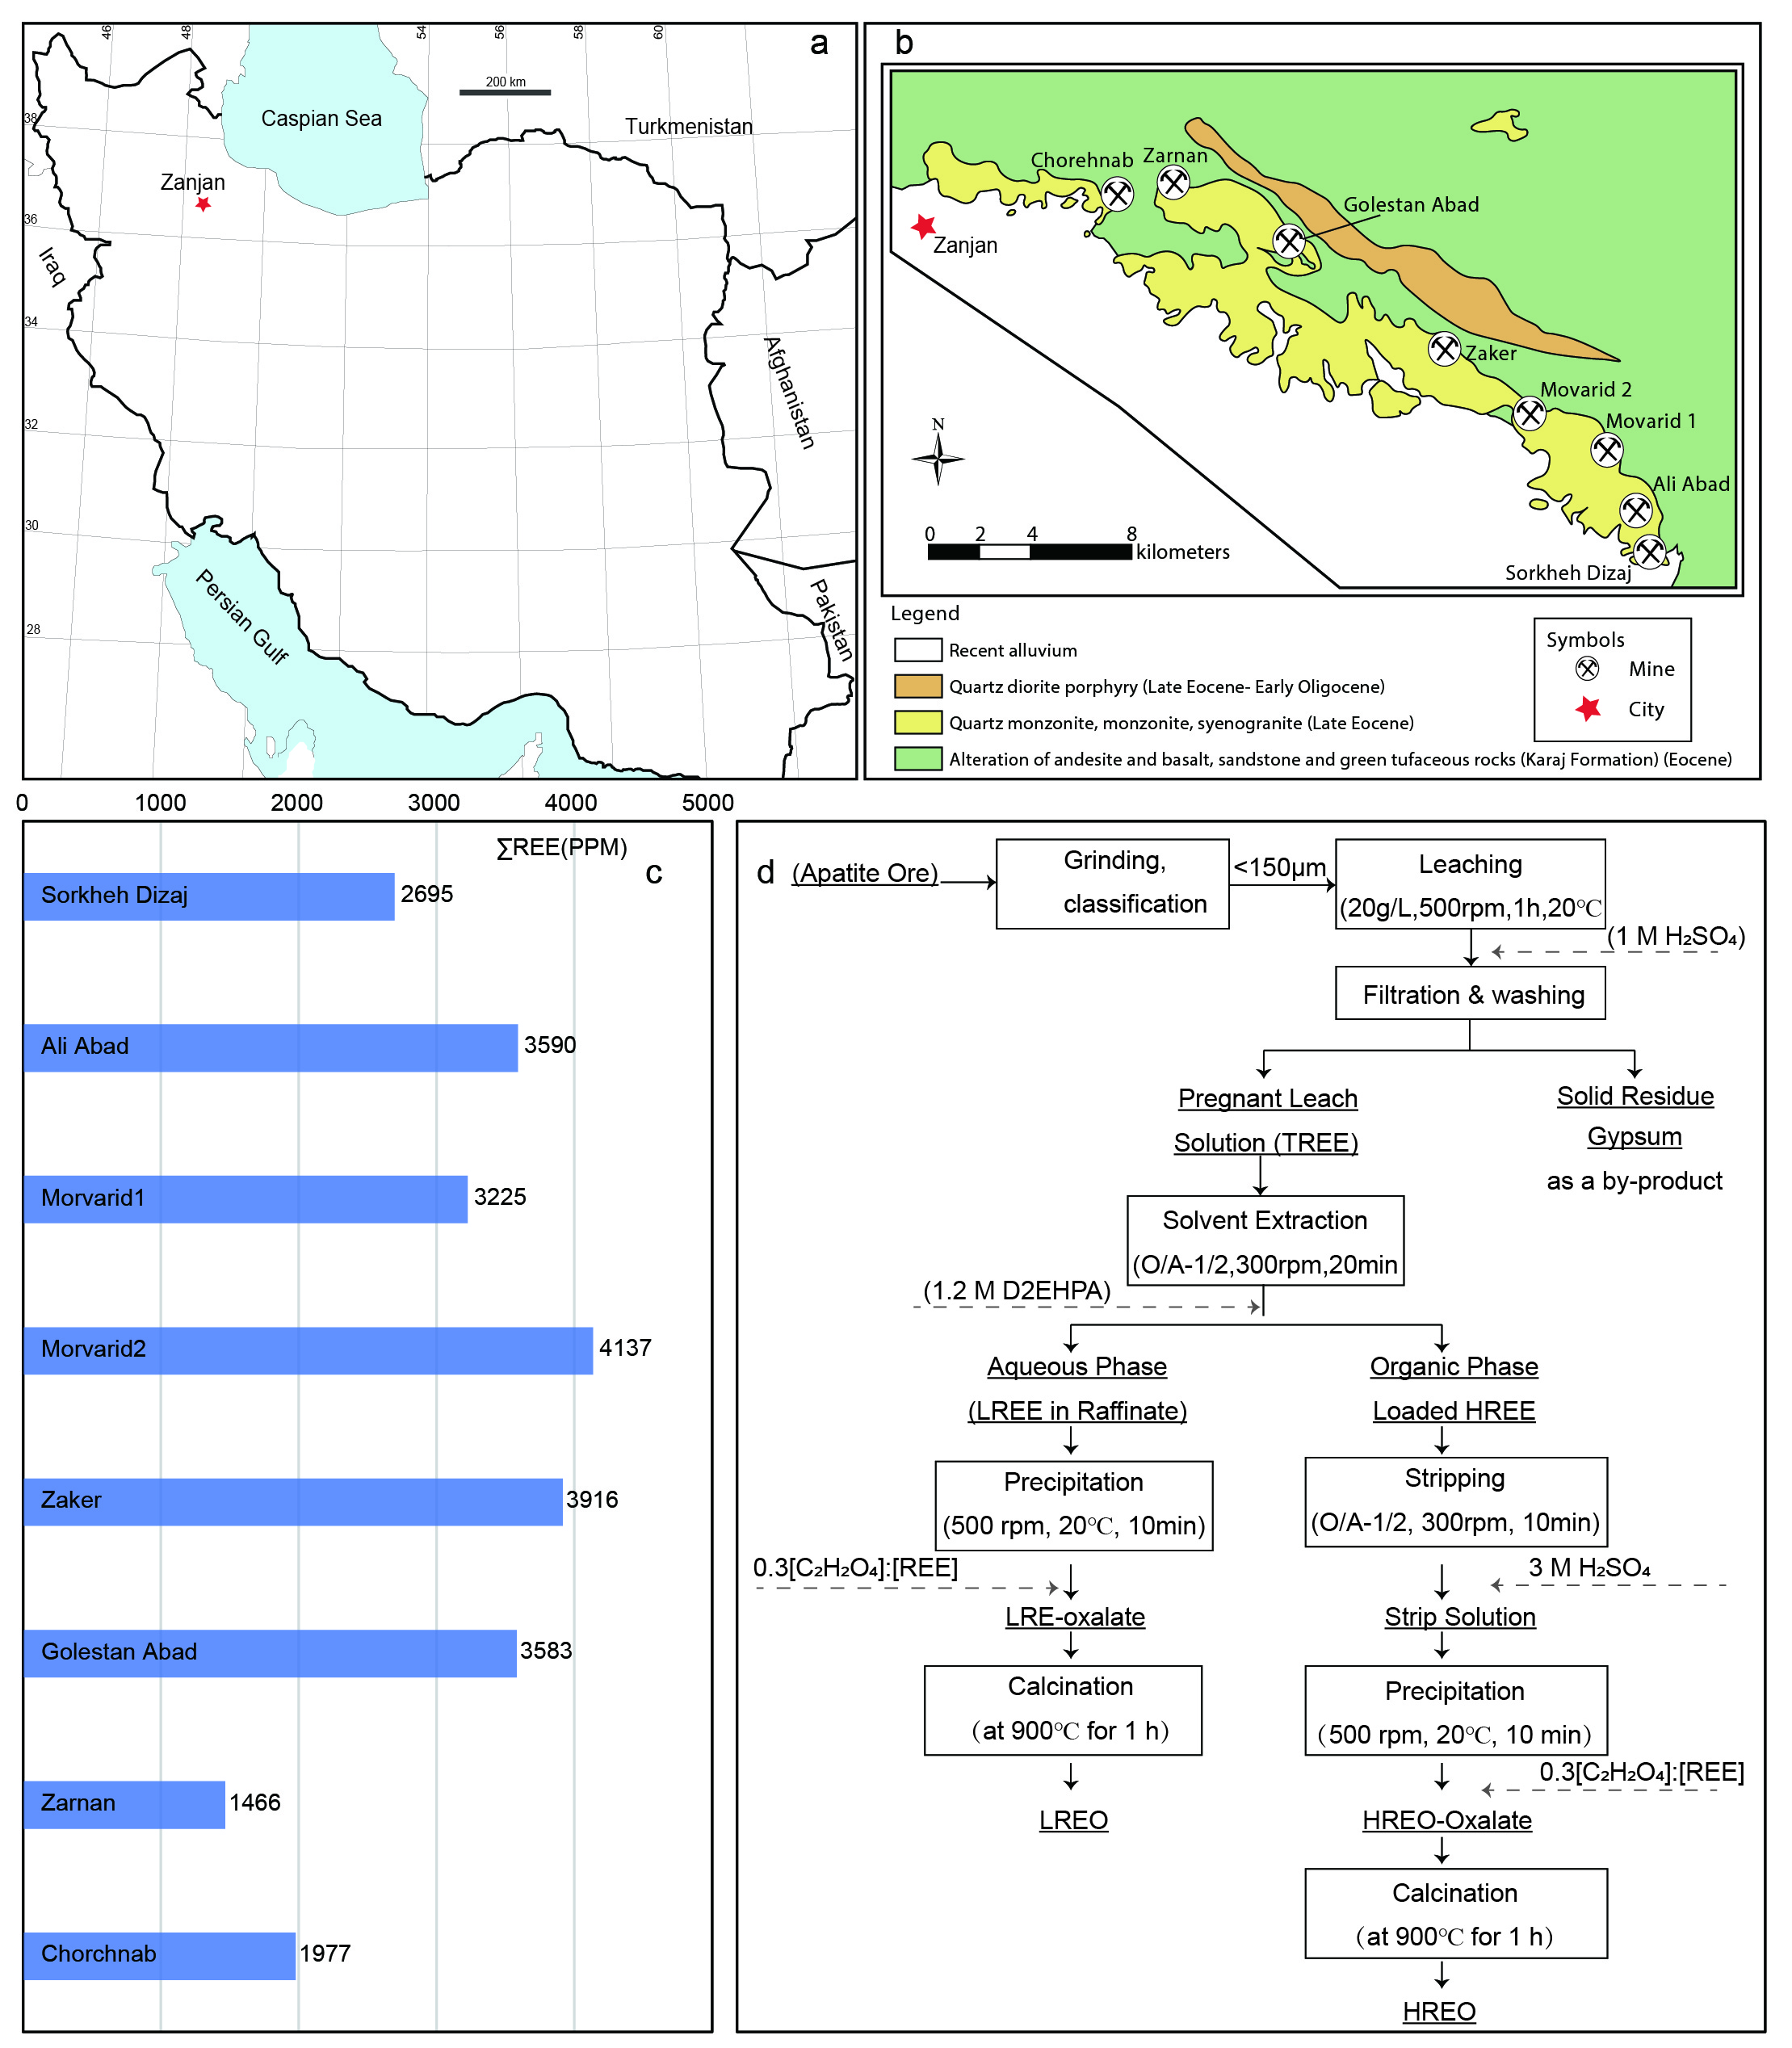


**Supp. Figure 1** (a-b) Location and simplified geological map of the Tarom mine district; and (c) average REE contents of different ores from the Kiruna type Tarom mine district, NW Iran (Mokhtari *et al.* 2018), showing a general trend that the higher apatite contents correspond higher REE contents.


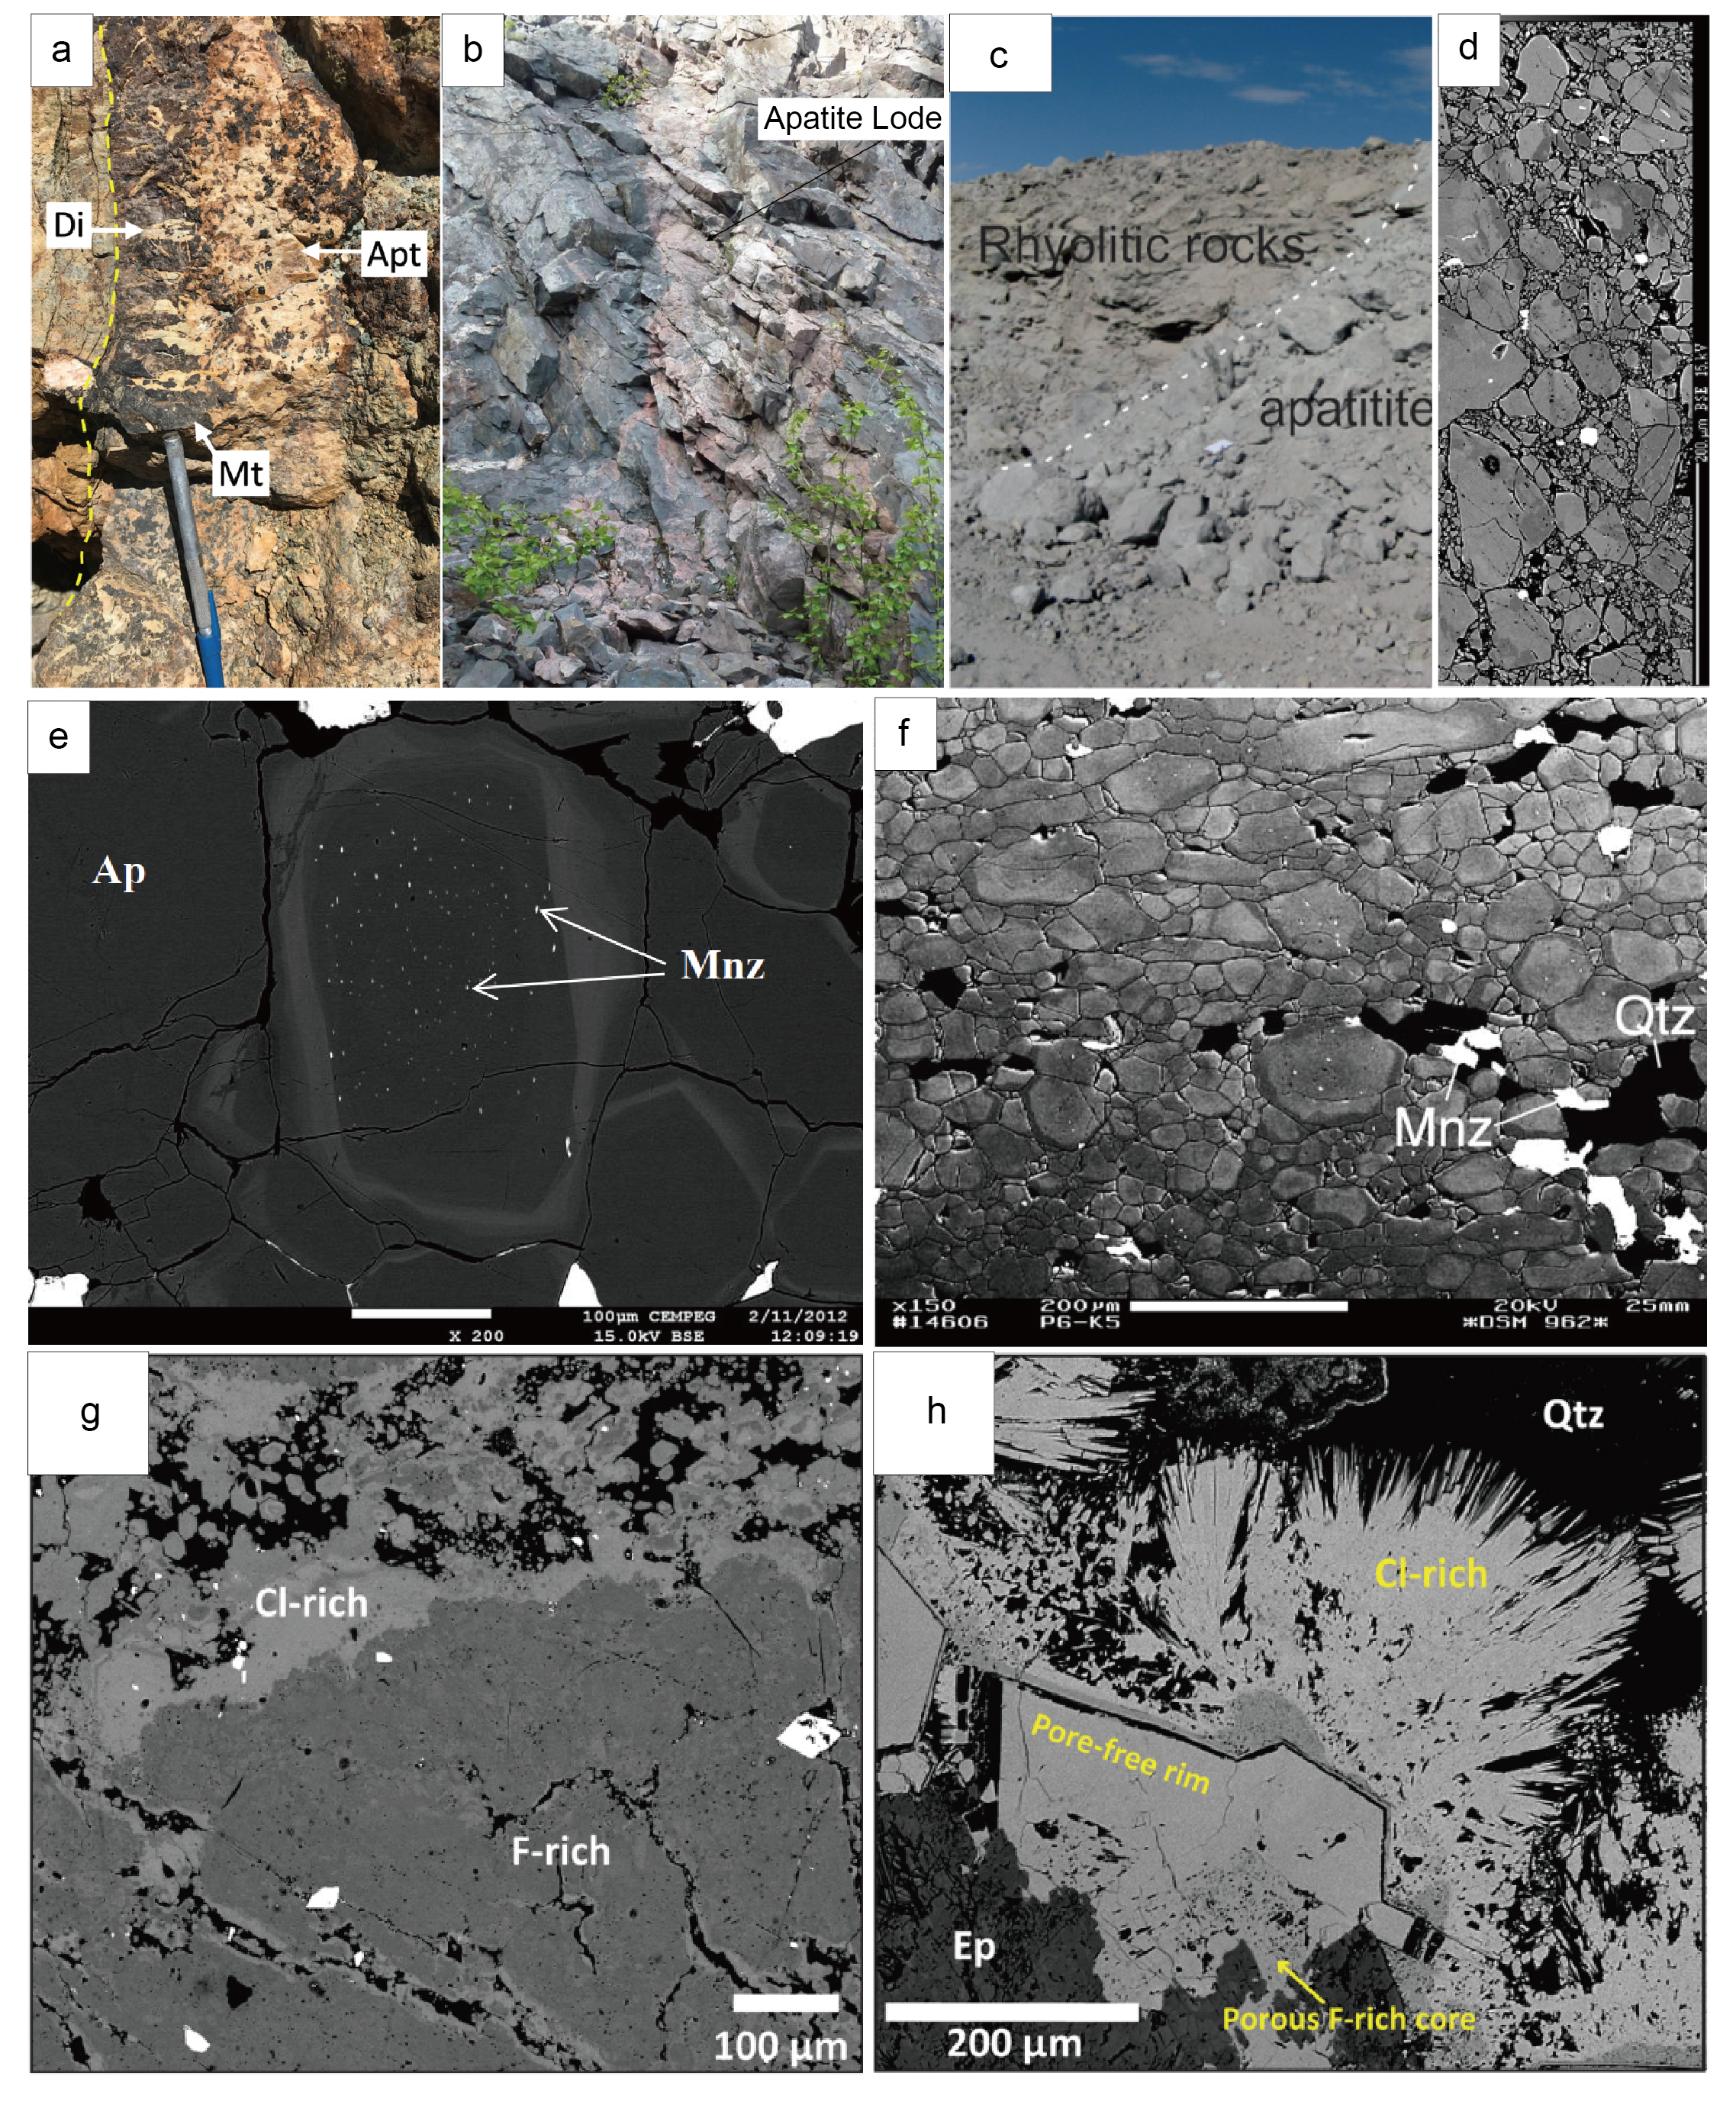


**Supp. Figure 2** Examples of macroscopic ore textures and microscopic apatite textures of IOA deposits. (a)apatite-magnetite dykes (Bain *et al.* 2020); (b-c) Examples of pure late apatite dykes (Andersson *et al.* 2016, Taghipour *et al.* 2015); (d-h) Examples of metasomatism-related apatite structures: (d) patchy zonation (Bonyadi *et al.* 2011); (e) reverse zonation (inner dark zone) (Majka *et al.* 2013); (f) concentric zonation (outer dark zone, corresponding to Figure 8 a in the main text) (Harlov *et al.* 2002); g, concentric zonation of altered F-apatite (corresponding to Figure 8c in the main text); h, forming needle-like apatite without REE decrease and monazite formation (corresponding to Figure 8d in the main text) (Palma *et al.* 2019).


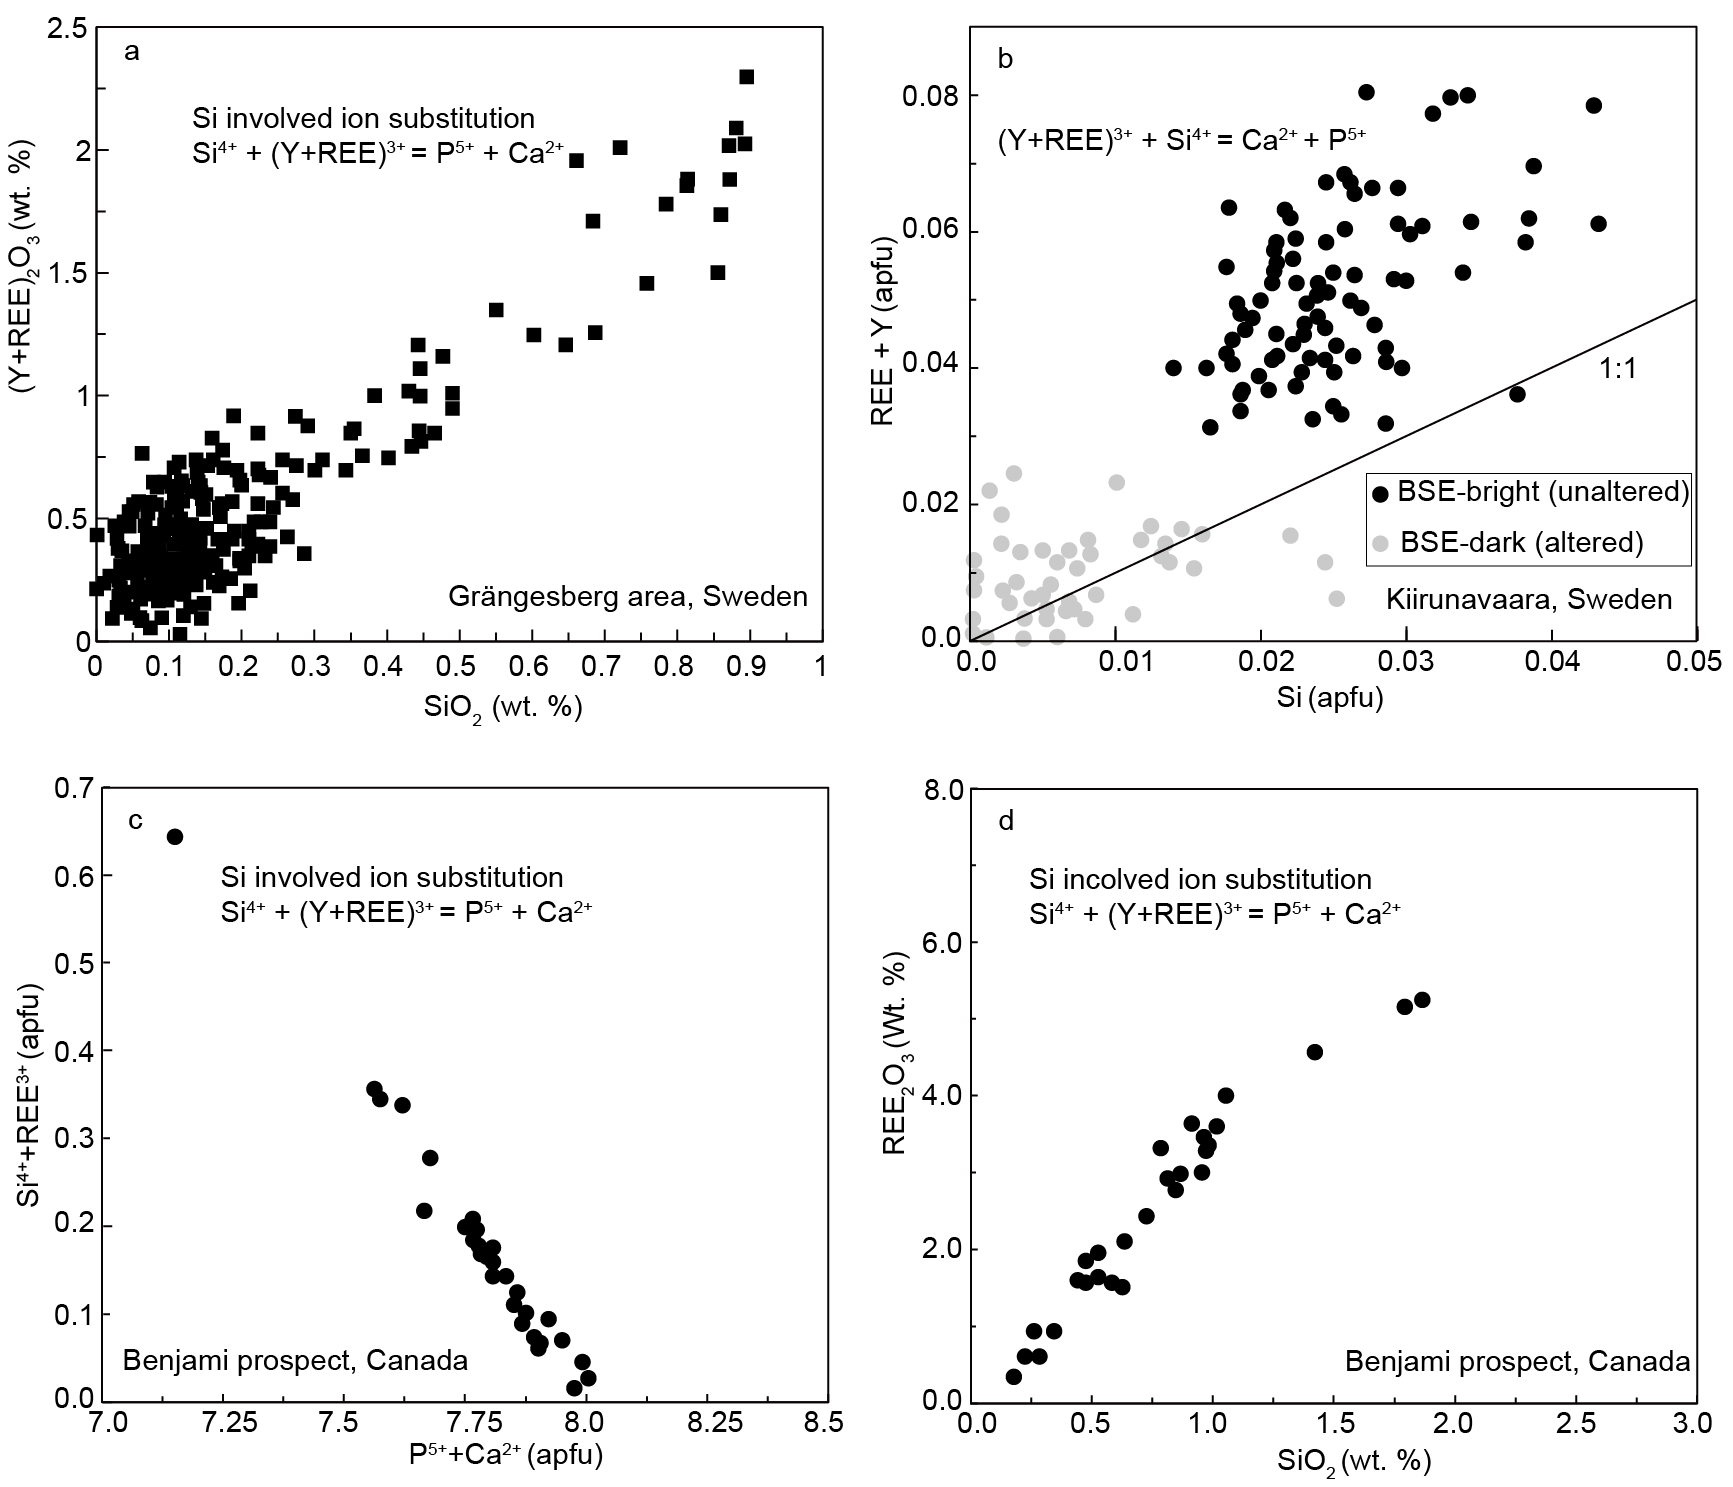


**Supp. Figure 3** Element plot of apatite from three IOA deposits, illustrating the major ion substitutions (formulas 2-8) controlling the enter or exit of REE in apatite in IOA deposits. Sulfur contents of apatite from Grangesberg and Benjami area are not reported, while that of the apatite from Kiirunavaara are shown in Figure 4d in main text. Adapted from Andersson *et al.* (2002), Hoshino *et al.* (2017), Jonsson *et al.* (2016).

**Supp. Table 1** Data for plotting Figure 3

| Apatite (unaltered) REE elemetns, Kiirunavaara IOA mine (ppm) | | | | | Allanite REE contents in Grängesberg IOA mine (wt. %) | | xenotime/monazite REE contents from IOA deposits in Bafq area (wt. %) | | | xenotime/monazite REE contents from Pea Ridge IOA deposit (wt. %) | |
| --- | --- | --- | --- | --- | --- | --- | --- | --- | --- | --- | --- |
| Elements | Bright | 2σ | Upper  limit | Lower  limit | Elements | allanite |  | xenotime | monazite-1 |  | monazite-2 |
| La | 1307 | 511 | 1818 | 796 | La2O3 | 7.57 | La2O3 | 0.05 | 14.57 | La2O3 | 18.3 |
| Ce | 2856 | 1002 | 3858 | 1854 | Ce2O3 | 12.76 | Ce2O3 | 0.17 | 33.69 | Ce2O3 | 32.73 |
| Pr | 377 | 128 | 505 | 249 | Pr2O3 | 1.08 | Pr2O3 | nr | 3.47 | Pr2O3 | 2.86 |
| Nd | 1407 | 439 | 1846 | 968 | Nd2O3 | 3.02 | Nd2O3 | 0.31 | 13.48 | Nd2O3 | 9.59 |
| Sm | 223 | 56 | 279 | 167 | Sm2O3 | 0.2 | Sm2O3 | 0.17 | 1.9 | Sm2O3 | 1.12 |
| Eu | 29 | 6 | 35 | 23 | Eu2O3 | nr | Eu2O3 | nr | nr | Eu2O3 | 0.12 |
| Gd | 207 | 43 | 250 | 164 | Gd2O3 | nr | Gd2O3 | 3.07 | 1.21 | Gd2O3 | 0.82 |
| Tb | 27 | 5 | 32 | 22 | Tb2O3 | nr | Tb2O3 | 0.57 | nr | Tb2O3 | 0.03 |
| Dy | 149 | 27 | 176 | 122 | Dy2O3 | nr | Dy2O3 | 5.13 | 0.1 | Dy2O3 | 0.35 |
| Ho | 30 | 5 | 35 | 25 | Ho2O3 | nr | Ho2O3 | 1.16 | nr | Ho2O3 | 0.04 |
| Er | 83 | 15 | 98 | 68 | Er2O3 | nr | Er2O3 | 3.48 | nr | Er2O3 | 0.09 |
| Tm | 11 | 2 | 13 | 9 | Tm2O3 | nr | Tm2O3 | nr | nr | Tm2O3 | nr |
| Yb | 61 | 11 | 72 | 50 | Yb2O3 | nr | Yb2O3 | 2.61 | nr | Yb2O3 | 0.03 |
| Lu | 9 | 2 | 11 | 7 | Lu2O3 | 0.05 | Lu2O3 | nr | nr | Lu2O3 | nr |

nr: not reported.

Sources: Harlov *et al.* (2002), Harlov *et al.* (2016), Jonsson *et al.* (2016), Stosch *et al.* (2010).

**Supp. Table 2** Estimation of REE resources in IOA deposits

| Atomic weight used |  | Calculations | t |
| --- | --- | --- | --- |
| Fe | 56 | Fe-ore | 10000 |
| Ca | 40 | P | 50 |
| P | 31 | P/Fluor-Ap | 0.18 |
| F | 19 | Ap | 271 |
| O | 16 | REEs + Y in Ap | 1.35 |
|  |  |  |  |
| Assumed value * |  | Estimation of REEs in the Kiirunavaara mine* | Mt |
| Fe/P (60/0.5) | 120 | Fe-ore | 1800 |
| Average REEs +Y in Ap(ppm) | 5000 | P | 9 |
|  |  | P/Fluor-Ap | 0.18 |
|  |  | Ap | 48.77 |
|  |  | REEs + Y in Ap | 0.24 |

* Based on previous studies (Harlov *et al.* 2002, Niiranen & Rutanen 2019), showing the Kiirunavaara ore contains ~1800Mt ores with ~60% Fe and ~0.5% P, while the apatite in the Kiirunavaara ore contains ~5000ppm REE on average.

**Supp. Table 3** Examples of IOA deposits from across the world, showing that mantle + evaporite (± carbonate) component may be general in forming this deposit type.

| Location/Deposit | Mantle affinity | Evaporite(carbonate) affinity | References |
| --- | --- | --- | --- |
| China: Most deposits in the Middle to Lower Yangtz River region (e.g., Meishan, Luohe, Nihe, Taocun) | Apatite C and Sr isotopes, indicative of mantle + crust sources of ore-forming materials. | Evaporites-sourced sulfur and halogen, as evidenced by anhydrite sulfur isotopes, and Cl/Br ratio of fluid inclusions. | Li *et al.* (2015), Yu *et al.* (2008) |
|  |  |  |  |
| China, Altay orogenic belt (Abagong) | Mantle derived sulfur evidenced by sulfur isotopes of pyrite from ores. | Host rocks contain carbonate layers. | Chai *et al.* (2014) |
|  |  |  |  |
| Iran: Zanjan district | Mantle origin of the ore-related magmas. | Host rocks contains intercalations of sedimentary rocks, such as limestone, sandstone and shale | Mokhtari *et al.* (2018), Nabatian *et al.* (2013) |
|  |  |  |  |
| Iran: Bafq district | Magmatic host rocks from partial melting of the subduction-modified mantle. | Evaporites-sourced sulfur, evidenced by pyrite sulfur isotope and regional geology. | Heidarian *et al.* (2017), Mehdipour Ghazi *et al.* (2019) |
|  |  |  |  |
| Canada: Great bear zone | Magmatic host rocks derived from a GLOSS-modified mantle wedge. | Evaporite sourced sulfur was involved in ore forming process, as evidenced by pyrite sulfur isotopes | Ootes *et al.* (2017) |
|  |  |  |  |
| Chile: El Laco | Sr-Nd isotopes of magmatic host rocks support a mantle affinity. | Mineralization is hosted in volcanic complex, which overlies evaporite bearing sediments. | Tornos *et al.* (2017) |
|  |  |  |  |
| Sweden: Kiirunavaara | Ore zircon Hf isotopes, indicative of depleted mantle affinity. | Evaporites geochemically evidenced by halogen ratio of fluid inclusions form late-stage quartz. | Martinsson *et al.* (2016), Westhues *et al.* (2017) |
|  |  |  |  |
| USA: Pea Ridge | Mantle source of magmatic host rocks evidenced by Nd isotopes. | Evaporated seawater was involved in forming the deposit. | Ayuso *et al.* (2016), Hofstra *et al.* (2016) |

**Supp. Table 4** Average composition (wt %) of the different phases present in the REE-doped experiment, with addition of 24% phosphoric acid (Lledo 2005).

| phase | Si-glass | P-Fe-glass | Whitlockite* | Monazite*’ | BULK |
| --- | --- | --- | --- | --- | --- |
| SiO2 | 55.4 | 3 | bdl | 2.4 | 45 |
| Al2O3 | 14.7 | 6.2 | bdl | 4.5 | 13.1 |
| P2O5 | 9.7 | 38.3 | 43.8 | 34.6 | 14.4 |
| FeO | 4.1 | 24 | 3.4 | 12 | 4.7 |
| MgO | 1 | 5.1 | 1.9 | 2.5 | 1.2 |
| CaO | 1.3 | 7.6 | 38.6 | 2.5 | 3.8 |
| Na2O | 0.7 | 1.5 | 0.2 | 0.9 | 3.3 |
| K2O | 0.6 | 0.3 | bdl | 0.1 | 2.2 |
| TiO2 | 0.6 | 1.7 | bdl | 0.3 | 0.8 |
| V2O3 | 0.3 | 1.7 | 0.1 | bdl | 0.6 |
| SrO | 0.6 | 2.9 | 3.6 | 1.2 | 0.7 |
| Ce2O3 | bdl | bdl | 1 | 14 | 0.7 |
| La2O3 | bdl | bdl | 1.4 | 22.3 | 0.7 |
| Er2O3 | 0.1 | 1.3 | 6.4 | 4.3 | 0.7 |
| Total (wt. %) | 89.1 | 93.6 | 100.4 | 101.6 | 91.8 |

* Verified with X-ray diffraction

’ La-Ce rich Fe-P phases with monazite structure

bdl, below detection limit.

Analyzed by Electronic Probe as LA-ICP-MS are not available at Lledo’s lab at 2005, leading to uncertainty of the LREE partition between the immiscible iron-rich and silicate -rich melts (Lledo 2021, personal communication)

**Supp. Table 5** Previous Fe-Si immiscibility experiments doped with REE

| Veksler *et al.* (2006) (P-absent system) (EPMA and LA ICP-MS analyses of quenched glasses) | | | | | | | | | | |
| --- | --- | --- | --- | --- | --- | --- | --- | --- | --- | --- |
|  |  |  |  |  |  |  | Deviate from traditional Fe-Si immiscibility line | | | |
| Run | C-36 | | C-38 | | C-137 | | C-39 | | C-40 | |
| T(℃), P | 1100 | | 1050 | | 1160 | | 1125 | | 1150 | |
| Phase (wt.%; ppm) | Lsi | Lfe | Lsi | Lfe | Lsi | Lfe | Lsi | Lfe | Lsi | Lfe |
| SiO2 | 69.36 | 49.2 | 68.18 | 54.42 | 67.06 | 51.42 | 60.11 | 48.25 | 60.09 | 49.63 |
| TiO2 | 1.33 | 2.34 | 1.49 | 2.5 | 2.46 | 4.84 | 2.18 | 2.18 | 2.14 | 2.27 |
| Al2O3 | 7.63 | 5.6 | 8.46 | 6.27 | 6.44 | 6.92 | 6.36 | 5.39 | 6.3 | 5.51 |
| MgO | 0.6 | 1.26 | 0.48 | 0.93 | 1.52 | 2.92 | 1.03 | 1.25 | 1.02 | 1.19 |
| FeO | 12.03 | 31.13 | 10.98 | 23.58 | 10.81 | 20.94 | 20.43 | 32.65 | 20.38 | 31.33 |
| CaO | 3.01 | 6.86 | 3.55 | 7.82 | 3.73 | 7.48 | 5.37 | 6.6 | 5.41 | 7.03 |
| SrO | 0.08 | 0.11 |  |  |  |  | 0.11 | 0.12 |  |  |
| BaO | 0 | 0.02 |  |  |  |  | 0.01 | 0.02 |  |  |
| Na2O | 0.64 | 0.41 | 0.69 | 0.5 | 1.05 | 0.98 | 0.51 | 0.41 | 0.51 | 0.41 |
| K2O | 4.59 | 1.95 | 4.93 | 2.48 | 4.15 | 2.34 | 3.17 | 1.87 | 2.84 | 1.79 |
| Rb2O | 0.2 | 0.1 | 0.18 | 0.11 |  |  | 0.14 | 0.09 |  |  |
| P2O5 |  |  |  |  |  |  |  |  |  |  |
| V2O3 |  |  |  |  |  |  |  |  |  |  |
| Er2O3 |  |  |  |  |  |  |  |  |  |  |
| Total | 99.47 | 98.97 | 98.94 | 98.61 | 97.21 | 97.84 | 99.42 | 98.81 | 98.7 | 99.14 |
| Y | 70 | 143 | 79 | 170 | 65 | 133 | 128 | 135 | 128 | 142 |
| La | 71 | 151 | 81 | 179 | 57 | 141 | 131 | 143 | 131 | 149 |
| Ce | 63 | 134 | 70 | 156 | 40 | 104 | 114 | 125 | 116 | 133 |
| Pr | 70 | 150 | 79 | 176 | 50 | 128 | 128 | 141 | 127 | 146 |
| Nd | 72 | 154 | 81 | 182 | 57 | 143 | 132 | 146 | 130 | 149 |
| Sm | 73 | 155 | 84 | 187 | 57 | 146 | 136 | 149 | 133 | 153 |
| Eu | 71 | 162 | 84 | 181 | 56 | 141 | 130 | 152 | 135 | 165 |
| Gd | 75 | 157 | 83 | 183 | 62 | 149 | 135 | 146 | 133 | 151 |
| Tb | 76 | 159 | 85 | 184 | 60 | 143 | 136 | 148 | 139 | 157 |
| Dy | 75 | 156 | 84 | 186 | 66 | 156 | 136 | 148 | 138 | 156 |
| Ho | 76 | 158 | 85 | 185 | 67 | 154 | 138 | 148 | 139 | 155 |
| Er | 77 | 157 | 88 | 191 | 66 | 154 | 142 | 153 | 140 | 156 |
| Tm | 76 | 155 | 86 | 185 | 69 | 154 | 139 | 149 | 137 | 152 |
| Yb | 77 | 155 | 92 | 194 | 72 | 165 | 147 | 157 | 145 | 161 |
| Lu | 79 | 159 | 91 | 192 | 74 | 160 | 146 | 155 | 143 | 158 |
| Dsi | 0.71 |  | 0.80 |  | 0.77 |  | 0.80 |  | 0.83 |  |
| TiO2+MgO+CaO  +FeOt+P2O5 | 16.97 | 41.59 | 16.5 | 34.83 | 18.52 | 36.18 | 29.01 | 42.68 | 28.95 | 41.82 |
| ΣREE | 1031 | 2162 | 1173 | 2561 | 853 | 2038 | 1890 | 2060 | 1886 | 2141 |
| ΣLREE | 420 | 906 | 479 | 1061 | 317 | 803 | 771 | 856 | 772 | 895 |
| ΣHREE | 611 | 1256 | 694 | 1500 | 536 | 1235 | 1119 | 1204 | 1114 | 1246 |
| DREEFe-Si | 2.10 |  | 2.18 |  | 2.39 |  | 1.09 |  | 1.14 |  |
| DLREEFe-Si | 2.16 |  | 2.22 |  | 2.53 |  | 1.11 |  | 1.16 |  |
| DHREEFe-Si | 2.06 |  | 2.16 |  | 2.30 |  | 1.08 |  | 1.12 |  |

**Supp. Table 5** (continued)

| Schmidt *et al.* (2006); (EPMA and LA ICP-MS analyses of quenched glasses) | | | | | Lledo (2005); EPMA results | |
| --- | --- | --- | --- | --- | --- | --- |
| Run | Z10 | | Z18a | |  |  |
| T(℃), P | 1600, 1.8 Gpa | | 1600, 1.8 Gpa | | 1000; 4Kbar | |
| Phase (wt.%; ppm) | Granitic glass | Gabbroic glass | Granitic glass | Gabbroic glass | Si-glass | P-Fe-glass |
| SiO2 | 72.2 | 37.1 | 67 | 48.5 | 55.4 | 3 |
| TiO2 | 0.19 | 0.95 |  |  | 0.6 | 1.7 |
| Al2O3 | 8 | 3.57 | 5.83 | 3.5 | 14.7 | 6.2 |
| MgO |  |  |  |  | 1 | 5.1 |
| FeO | 11.5 | 51.4 | 21.1 | 45 | 4.1 | 24 |
| CaO |  |  |  |  | 1.3 | 7.6 |
| SrO |  |  |  |  | 0.6 | 2.9 |
| BaO |  |  |  |  |  |  |
| Na2O |  |  |  |  | 0.7 | 1.5 |
| K2O | 7.4 | 1.66 | 5.83 | 2.72 | 0.6 | 0.3 |
| Rb2O |  |  |  |  |  |  |
| P2O5 | 0.21 | 1.77 | 0.03 | 0.1 | 9.7 | 38.3 |
| V2O3 |  |  |  |  | 0.3 | 1.7 |
| Er2O3 |  |  |  |  | 0.1 | 1.3 |
| Total | 99.5 | 96.45 | 99.79 | 99.82 | 89.1 | 93.6 |
| Y | 220 | 2040 | 105 | 296 |  |  |
| La | 196 | 1940 | 80.1 | 234 |  |  |
| Ce | 1.15 | 11.1 |  |  |  |  |
| Pr |  |  |  |  |  |  |
| Nd | 1.17 | 13.8 |  |  |  |  |
| Sm | 189 | 1930 | 70 | 210 |  |  |
| Eu | 1.57 | 13.9 | 383 | 846 |  |  |
| Gd | 1 | 8.2 | 282 | 849 |  |  |
| Tb |  |  |  |  |  |  |
| Dy | 0.64 | 5.04 | 328 | 965 |  |  |
| Ho |  |  |  |  |  |  |
| Er | 0.3 | 2.76 | 329 | 968 |  |  |
| Tm |  |  |  |  |  |  |
| Yb | 0.48 | 4.8 |  |  |  |  |
| Lu | 212 | 1850 | 94.1 | 264 |  |  |
| Dsi | 0.51 | 0.51 | 0.72 | 0.72 | 0.05 | 0.05 |
| TiO2+MgO+CaO +FeOt+P2O5 | 11.9 | 54.12 | 21.13 | 45.1 | 16.7 | 76.7 |
| ΣREE | 603.31 | 5779.6 | 1566.2 | 4336 |  |  |
| ΣLREE | 388.89 | 3908.8 | 533.1 | 1290 |  |  |
| ΣHREE | 214.42 | 1870.8 | 1033.1 | 3046 |  |  |
| DREEFe-Si | 9.58 |  | 2.77 |  |  |  |
| DLREEFe-Si | 10.05 |  | 2.42 |  |  |  |
| DHREEFe-Si | 8.72 |  | 2.95 |  | DErFe-Si | 13.00 |

**Supp. Table 6** Data for figure 8

| **LA-ICP-MS data for apatite from Kiirunavaara**, fromHarlov *et al.* (2002). | | | | | | | | |
| --- | --- | --- | --- | --- | --- | --- | --- | --- |
|  | Unaltered | 2σ | B-up | B-lwo | Altered | 2σ | D-up | D-low |
| La | 1307 | 511 | 1818 | 796 | 454 | 47 | 501 | 407 |
| Ce | 2856 | 1002 | 3858 | 1854 | 1137 | 134 | 1271 | 1003 |
| Pr | 377 | 128 | 505 | 249 | 163 | 13 | 176 | 150 |
| Nd | 1407 | 439 | 1846 | 968 | 670 | 57 | 727 | 613 |
| Sm | 223 | 56 | 279 | 167 | 138 | 10 | 148 | 128 |
| Eu | 29 | 6 | 35 | 23 | 19 | 1 | 20 | 18 |
| Gd | 207 | 43 | 250 | 164 | 164 | 10 | 174 | 154 |
| Tb | 27 | 5 | 32 | 22 | 23 | 1 | 24 | 22 |
| Dy | 149 | 27 | 176 | 122 | 135 | 8 | 143 | 127 |
| Ho | 30 | 5 | 35 | 25 | 28 | 2 | 30 | 26 |
| Er | 83 | 15 | 98 | 68 | 77 | 8 | 85 | 69 |
| Tm | 11 | 2 | 13 | 9 | 10 | 1 | 11 | 9 |
| Yb | 61 | 11 | 72 | 50 | 56 | 6 | 62 | 50 |
| Lu | 9 | 2 | 11 | 7 | 8 | 1 | 9 | 7 |

| **LA-ICP-MS data for apatite types from Taocun**, fromZeng *et al.* (2016). | | | | | | | | | | | | | | | | | |
| --- | --- | --- | --- | --- | --- | --- | --- | --- | --- | --- | --- | --- | --- | --- | --- | --- | --- |
| **Unaltered domain fluorapatite** | | | | | | | | | **Altered domain in fluorapatite** | | | | | | | | |
| La | 1771 | 2595 | 1601 | 2411 | 1729 | 2749 | 2059 | 2257 | 2519 | 403 | 243 | 297 | 595 | 482 | 534 | 617 | 692 |
| Ce | 2884 | 4170 | 2662 | 3893 | 2802 | 4411 | 3400 | 3736 | 4123 | 834 | 654 | 644 | 1146 | 913 | 995 | 1139 | 1199 |
| Pr | 272 | 387 | 258 | 360 | 263 | 404 | 325 | 353 | 382 | 89.0 | 79.5 | 70.9 | 119 | 93.5 | 101 | 112 | 114 |
| Nd | 981 | 1352 | 936 | 1263 | 955 | 1397 | 1160 | 1274 | 1352 | 348 | 338 | 274 | 458 | 354 | 391 | 419 | 417 |
| Sm | 140 | 183 | 135 | 170 | 134 | 186 | 164 | 173 | 184 | 52.8 | 53.7 | 44.0 | 71.1 | 52.6 | 59.9 | 60.1 | 56.7 |
| Eu | 21.1 | 29.7 | 18.1 | 28.3 | 21.1 | 31.9 | 25.5 | 28.5 | 30.0 | 8.26 | 8.41 | 6.14 | 10.9 | 6.68 | 7.60 | 9.22 | 8.05 |
| Gd | 117 | 153 | 118 | 141 | 118 | 148 | 136 | 145 | 153 | 45.3 | 47.2 | 40.3 | 59.7 | 46.0 | 49.3 | 52.0 | 47.5 |
| Tb | 13.3 | 17.5 | 13.7 | 16.1 | 13.5 | 17.4 | 16.2 | 17.6 | 18.2 | 5.23 | 5.75 | 4.94 | 7.43 | 5.79 | 5.92 | 5.94 | 5.54 |
| Dy | 73.9 | 92.5 | 75.1 | 87.2 | 74.0 | 93.2 | 88.5 | 93.2 | 96.6 | 27.5 | 33.0 | 28.9 | 40.3 | 32.7 | 31.4 | 32.6 | 29.5 |
| Ho | 14.6 | 19.1 | 14.9 | 16.9 | 14.5 | 18.5 | 17.5 | 19.3 | 19.3 | 5.75 | 6.30 | 5.73 | 8.18 | 6.24 | 6.39 | 6.51 | 5.99 |
| Er | 38.3 | 47.6 | 39.0 | 43.8 | 37.9 | 47.4 | 45.1 | 48.8 | 49.0 | 14.3 | 16.1 | 15.3 | 21.2 | 16.1 | 16.0 | 16.3 | 15.1 |
| Tm | 5.06 | 6.57 | 5.15 | 5.86 | 4.96 | 6.03 | 5.88 | 6.46 | 6.31 | 1.90 | 2.23 | 1.96 | 2.89 | 2.08 | 2.20 | 2.13 | 1.95 |
| Yb | 31.1 | 37.1 | 31.7 | 33.9 | 29.4 | 37.0 | 37.7 | 40.6 | 39.6 | 11.6 | 13.4 | 12.7 | 17.4 | 12.6 | 13.5 | 13.7 | 12.5 |
| Lu | 4.36 | 4.73 | 4.31 | 4.78 | 4.54 | 4.92 | 4.67 | 5.10 | 5.29 | 1.55 | 1.82 | 1.75 | 2.34 | 2.04 | 1.88 | 1.84 | 1.67 |

| **LA-ICP-MS data for apatite types from Carmen,** from Palma *et al.* (2019). | | | | | | | | | | | | | | | | | |
| --- | --- | --- | --- | --- | --- | --- | --- | --- | --- | --- | --- | --- | --- | --- | --- | --- | --- |
| Fluor-apatite | | | | | | | | | | | | | | | | | |
| La | 357 | 241 | 243 | 287 | 207 | 246 | 255 | 236 | 344 | 426 | 255 | 254 | 277 | 308 | 257 | 286 | 184 |
| Ce | 1223 | 1054 | 949 | 1094 | 839 | 918 | 999 | 951 | 1244 | 1501 | 988 | 1031 | 1199 | 1148 | 1020 | 1398 | 856 |
| Pr | 193 | 189 | 166 | 185 | 149 | 161 | 167 | 159 | 190 | 241 | 163 | 177 | 200 | 200 | 171 | 215 | 157 |
| Nd | 982 | 1086 | 931 | 1024 | 818 | 910 | 902 | 851 | 1027 | 1292 | 870 | 977 | 1101 | 1025 | 898 | 1041 | 935 |
| Sm | 244 | 272 | 239 | 251 | 221 | 205 | 224 | 216 | 259 | 304 | 241 | 259 | 272 | 255 | 243 | 164 | 263 |
| Eu | 15.6 | 15.5 | 13.3 | 12.6 | 12.7 | 12.6 | 14.2 | 13.2 | 14 | 15.7 | 14.1 | 13.2 | 13.9 | 14.7 | 14.6 | 6.84 | 15.4 |
| Gd | 251 | 306 | 256 | 269 | 230 | 224 | 233 | 251 | 288 | 327 | 297 | 294 | 288 | 276 | 265 | 152 | 297 |
| Tb | 33.7 | 39.6 | 31.3 | 34.4 | 30.9 | 28.5 | 29.5 | 33.6 | 40.3 | 41 | 39.8 | 39.2 | 39.6 | 34.0 | 37.5 | 16.2 | 40.5 |
| Dy | 180 | 221 | 175 | 182 | 169 | 155 | 164 | 192 | 231 | 233 | 225 | 221 | 221 | 194 | 211 | 82.7 | 225 |
| Ho | 34.7 | 44.7 | 33.8 | 37.6 | 31.6 | 29.7 | 33.1 | 38.2 | 46.1 | 43.7 | 47.2 | 44.0 | 42.6 | 38.9 | 43.5 | 14.9 | 43.9 |
| Er | 83 | 107 | 81.0 | 87.7 | 75.1 | 69.2 | 80.9 | 94.8 | 115 | 108 | 118 | 108 | 104 | 91.3 | 107 | 35.2 | 108 |
| Tm | 9.53 | 13 | 9.00 | 10.8 | 8.58 | 7.55 | 9.45 | 11.1 | 14.5 | 13.7 | 15.0 | 13.3 | 12.6 | 10.8 | 13.5 | 3.50 | 12.8 |
| Yb | 50.5 | 73.1 | 47.9 | 59.6 | 45.3 | 43.3 | 55.5 | 66.6 | 78.5 | 71.9 | 84.0 | 76.5 | 69.7 | 63.1 | 74.5 | 18.0 | 70.6 |
| Lu | 6.71 | 9.66 | 6.14 | 7.71 | 5.57 | 5.51 | 7.56 | 9.12 | 10.1 | 9.34 | 11.1 | 9.87 | 9.75 | 8.00 | 10.2 | 2.15 | 8.70 |

**LA-ICP-MS data for apatite types from Carmen (Continued)**

| Fluor-apatite | | | | | | | | | | | | | | | | | |
| --- | --- | --- | --- | --- | --- | --- | --- | --- | --- | --- | --- | --- | --- | --- | --- | --- | --- |
| 179 | 300 | 347 | 225 | 327 | 387 | 311 | 129 | 130 | 206 | 152 | 210 | 204 | 183 | 142 | 150 | 147 | 167 |
| 835 | 1353 | 1519 | 972 | 1427 | 1685 | 1412 | 624 | 613 | 1130 | 651 | 986 | 1060 | 895 | 590 | 623 | 668 | 658 |
| 153 | 242 | 253 | 172 | 252 | 284 | 251 | 121 | 110 | 213 | 117 | 176 | 201 | 169 | 107 | 114 | 127 | 116 |
| 862 | 1379 | 1376 | 943 | 1409 | 1494 | 1399 | 767 | 639 | 1238 | 676 | 1013 | 1186 | 980 | 621 | 667 | 745 | 668 |
| 238 | 349 | 318 | 275 | 336 | 333 | 334 | 228 | 163 | 308 | 194 | 267 | 320 | 269 | 179 | 207 | 218 | 194 |
| 12.7 | 16.5 | 14.0 | 14.5 | 15.8 | 14.7 | 14.6 | 9.90 | 6.85 | 8.47 | 11 | 10.3 | 10.1 | 8.00 | 10.3 | 12.0 | 12.2 | 11.7 |
| 264 | 377 | 331 | 313 | 357 | 344 | 347 | 273 | 187 | 322 | 226 | 289 | 332 | 300 | 211 | 256 | 260 | 220 |
| 35.5 | 50.4 | 41.2 | 42.6 | 46.3 | 43.6 | 42.6 | 36.4 | 22.9 | 40.7 | 28.8 | 37.5 | 43.0 | 39.6 | 29.0 | 35.5 | 34.5 | 30.7 |
| 196 | 271 | 216 | 228 | 252 | 231 | 236 | 202 | 122 | 220 | 161 | 206 | 238 | 215 | 160 | 202 | 186 | 165 |
| 38.0 | 53.5 | 43.1 | 43.8 | 49.9 | 44.5 | 44.8 | 38.9 | 24.2 | 43.0 | 30.3 | 39.8 | 45.6 | 41.1 | 31.2 | 39.2 | 36.9 | 31.9 |
| 92.7 | 130 | 99.8 | 113 | 122 | 105 | 106 | 97.7 | 57.7 | 101 | 70.3 | 97.0 | 109 | 101 | 73.9 | 94.5 | 90.9 | 77.7 |
| 11.3 | 15.4 | 11.8 | 12.6 | 14.0 | 12.3 | 12.5 | 10.6 | 6.45 | 11.8 | 8.09 | 11.3 | 12.7 | 11.7 | 8.69 | 11.2 | 11.1 | 9.21 |
| 59.5 | 85.6 | 60.9 | 70.9 | 79.7 | 68.5 | 68.3 | 59.7 | 32.9 | 64.5 | 44.0 | 63.9 | 71.3 | 67.4 | 46.5 | 62.0 | 64.7 | 52.4 |
| 7.52 | 10.9 | 7.84 | 8.88 | 10.1 | 9.37 | 8.59 | 7.27 | 4.26 | 8.22 | 5.65 | 8.55 | 9.23 | 9.05 | 6.35 | 8.27 | 9.29 | 6.81 |

**LA-ICP-MS data for apatite types from Carmen (Continued)**

| Fluor-apatite | | | | | | | | | | | | | | Cl-OH-apatite | | | |
| --- | --- | --- | --- | --- | --- | --- | --- | --- | --- | --- | --- | --- | --- | --- | --- | --- | --- |
| 142 | 177 | 158 | 183 | 162 | 209 | 181 | 151 | 105 | 243 | 219 | 185 | 227 | 249 | 116 | 76.6 | 62.6 | 67.4 |
| 677 | 768 | 874 | 937 | 806 | 930 | 923 | 596 | 484 | 1087 | 1118 | 910 | 1110 | 1241 | 633 | 492 | 394 | 473 |
| 124 | 141 | 156 | 177 | 142 | 174 | 171 | 106 | 88.4 | 185 | 198 | 164 | 192 | 227 | 166 | 114 | 102 | 108 |
| 736 | 799 | 860 | 995 | 780 | 997 | 969 | 586 | 515 | 1017 | 1048 | 903 | 1094 | 1318 | 1088 | 750 | 698 | 733 |
| 206 | 229 | 180 | 231 | 176 | 263 | 223 | 171 | 147 | 259 | 225 | 216 | 267 | 342 | 389 | 272 | 276.7 | 312 |
| 9.47 | 12.2 | 5.48 | 6.44 | 8.19 | 16.21 | 13.2 | 11.2 | 8.56 | 11.0 | 7.31 | 10.4 | 10.04 | 13.4 | 25.1 | 18.9 | 17.3 | 19.1 |
| 235 | 262 | 175 | 235 | 160 | 267 | 220 | 180 | 168 | 272 | 210 | 219 | 276 | 364 | 397 | 323 | 323 | 375 |
| 32.6 | 35.7 | 21.3 | 30.8 | 19.4 | 35.9 | 25.4 | 24.3 | 22.2 | 35.6 | 26.3 | 27.4 | 35.6 | 47.2 | 52.6 | 48.2 | 46.9 | 58.6 |
| 176 | 205 | 111 | 163 | 98.0 | 191 | 126 | 123 | 118 | 184 | 138 | 139 | 189 | 251 | 268 | 255 | 256 | 328 |
| 33.3 | 40.8 | 21.2 | 31.5 | 18.6 | 35.7 | 23.2 | 22.3 | 22.8 | 37.3 | 26.2 | 27.2 | 36.6 | 48.7 | 48.1 | 44.2 | 46.0 | 63.0 |
| 78.3 | 99.9 | 50.4 | 74.7 | 42.9 | 81.8 | 51.2 | 50.1 | 52.2 | 85.6 | 59.3 | 64.7 | 84.9 | 115 | 109.1 | 96.9 | 103.1 | 150 |
| 9.36 | 12.3 | 5.51 | 8.63 | 4.50 | 9.34 | 5.62 | 5.06 | 5.85 | 9.71 | 6.92 | 7.25 | 9.65 | 13.5 | 12.4 | 11.1 | 11.57 | 17.5 |
| 50.7 | 70.8 | 32.3 | 47.9 | 24.5 | 49.5 | 29.9 | 25.8 | 31.6 | 57.3 | 37.6 | 40.5 | 52.4 | 73.7 | 65.7 | 53.2 | 55.5 | 99.0 |
| 6.79 | 9.59 | 4.05 | 6.19 | 3.27 | 6.19 | 3.56 | 3.05 | 4.12 | 7.17 | 4.66 | 5.01 | 7.09 | 9.72 | 7.80 | 4.65 | 5.50 | 11.2 |

**LA-ICP-MS data for apatite types from Carmen (Continued)**

| Cl-OH-apatite | | | | | | | | | | | | | | | | | | |
| --- | --- | --- | --- | --- | --- | --- | --- | --- | --- | --- | --- | --- | --- | --- | --- | --- | --- | --- |
| 71.3 | 152 | 55 | 122 | 129 | 180 | 86.6 | 104 | 88.7 | 79.9 | 95.0 | 92.6 | 107 | 100 | 49.7 | 54.7 | 55.7 | 50.7 | 63.2 |
| 440 | 809 | 354 | 762 | 688 | 843 | 580 | 549 | 576 | 473 | 579 | 540 | 666 | 595 | 350 | 426 | 431 | 354 | 423 |
| 112 | 229 | 87 | 163 | 210 | 166 | 137 | 146 | 134 | 114 | 133 | 132 | 147 | 130 | 95.1 | 105 | 115 | 95.0 | 113 |
| 757 | 1529 | 595 | 998 | 1383 | 977 | 868 | 968 | 862 | 702 | 855 | 811 | 886 | 766 | 637 | 694 | 750 | 659 | 758 |
| 281 | 508 | 226 | 308 | 453 | 311 | 284 | 320 | 307 | 230 | 261 | 258 | 264 | 227 | 212 | 224 | 236 | 230 | 248 |
| 16.8 | 33.7 | 19.3 | 23.5 | 29.4 | 22.6 | 18.4 | 21.6 | 21.6 | 20.7 | 23.2 | 24.7 | 30.2 | 24.2 | 11.0 | 12.4 | 11.7 | 12.5 | 11.7 |
| 314 | 478 | 273 | 330 | 399 | 333 | 291 | 306 | 339 | 241 | 244 | 259 | 260 | 227 | 211 | 230 | 226 | 234 | 227 |
| 45.4 | 55.8 | 40.5 | 45.9 | 45.6 | 47.4 | 38.0 | 35.2 | 44.9 | 32.5 | 31.4 | 32.6 | 32.3 | 29.3 | 27.1 | 30.5 | 28.5 | 29.1 | 30.2 |
| 240 | 254 | 230 | 246 | 204 | 260 | 190 | 162 | 239 | 165 | 141 | 161 | 163 | 140 | 143 | 162 | 140 | 151 | 157 |
| 42.0 | 41.1 | 41.6 | 46.0 | 32.0 | 47.7 | 32.8 | 26.1 | 43.2 | 29.5 | 22.3 | 27.3 | 28.4 | 24.3 | 24.6 | 30.9 | 24.8 | 26.0 | 26.7 |
| 91.1 | 84.9 | 99.7 | 106 | 64.5 | 111 | 68.5 | 52.1 | 94.6 | 61.3 | 47.8 | 57.3 | 55.4 | 46.4 | 53.8 | 77.0 | 52.4 | 57.8 | 61.3 |
| 9.50 | 9.2 | 11.5 | 12.9 | 6.95 | 13.3 | 7.08 | 5.26 | 10.9 | 7.32 | 4.98 | 6.15 | 5.23 | 4.31 | 5.97 | 8.90 | 5.28 | 5.75 | 6.5 |
| 48.6 | 45.4 | 62.6 | 68.3 | 33.5 | 71.5 | 30.9 | 25.2 | 54.6 | 34.6 | 25.8 | 30.0 | 23.2 | 17.7 | 29.3 | 48.0 | 27.0 | 27.8 | 32.9 |
| 4.80 | 5.10 | 6.33 | 7.67 | 3.39 | 8.19 | 2.87 | 2.48 | 6.34 | 3.63 | 2.38 | 2.75 | 1.88 | 1.47 | 3.23 | 5.70 | 3.14 | 3.09 | 3.30 |

**LA-ICP-MS data for apatite types from Mariela**, fromPalma *et al.* (2019).

|  | Cl-OH-F-apatite | | | | | | | | | | | | | | | | | |
| --- | --- | --- | --- | --- | --- | --- | --- | --- | --- | --- | --- | --- | --- | --- | --- | --- | --- | --- |
| La | 360 | 357 | 370 | 362 | 381 | 312 | 353 | 369 | 377 | 391 | 345 | 301 | 353 | 353 | 323 | 342 | 350 | 365 |
| Ce | 622 | 639 | 648 | 634 | 652 | 531 | 629 | 647 | 648 | 704 | 648 | 550 | 679 | 686 | 632 | 660 | 667 | 677 |
| Pr | 54.6 | 56.1 | 55.2 | 54.2 | 56.4 | 45.5 | 54.3 | 55.8 | 57.2 | 59.5 | 54.8 | 46.7 | 56.5 | 58.4 | 54.6 | 55.7 | 54.8 | 56.4 |
| Nd | 182 | 185 | 180 | 183 | 187 | 160 | 179 | 181 | 183 | 201 | 178 | 155 | 186 | 185 | 180 | 182 | 186 | 187 |
| Sm | 25.2 | 24.7 | 23.8 | 25.5 | 23.1 | 22.3 | 24.7 | 24.8 | 24.8 | 25.2 | 25.0 | 20.9 | 25.6 | 25.0 | 23.6 | 24.6 | 25.5 | 25.5 |
| Eu | 3.23 | 3.03 | 3.37 | 3.58 | 3.99 | 2.86 | 2.86 | 3.16 | 3.75 | 3.30 | 3.30 | 2.44 | 3.37 | 3.81 | 2.95 | 2.99 | 3.16 | 3.81 |
| Gd | 24.1 | 25.0 | 24.4 | 23.9 | 25.3 | 20.9 | 24.1 | 23.0 | 25.7 | 25.1 | 22.3 | 19.5 | 23.5 | 21.5 | 22.4 | 22.1 | 22.7 | 23.7 |
| Tb | 2.70 | 2.85 | 2.86 | 2.60 | 2.87 | 2.36 | 2.53 | 2.87 | 2.65 | 2.89 | 2.51 | 2.30 | 2.62 | 2.97 | 2.67 | 2.71 | 2.75 | 2.49 |
| Dy | 14.2 | 14.8 | 14.1 | 14.1 | 14.7 | 12.2 | 14.1 | 14.4 | 15.2 | 15.0 | 12.91 | 11.0 | 14.5 | 15.4 | 14.6 | 14.1 | 13.9 | 14.4 |
| Ho | 2.82 | 2.80 | 2.85 | 2.9 | 3.16 | 2.41 | 3.05 | 3.02 | 3.19 | 3.18 | 2.55 | 2.47 | 2.95 | 3.09 | 2.70 | 2.98 | 2.81 | 2.88 |
| Er | 7.42 | 8.04 | 7.68 | 8.01 | 7.96 | 6.55 | 7.31 | 7.73 | 7.82 | 7.54 | 6.91 | 5.87 | 7.40 | 7.63 | 7.25 | 7.19 | 7.35 | 7.12 |
| Tm | 0.91 | 0.87 | 0.94 | 0.90 | 0.80 | 0.69 | 0.85 | 0.95 | 0.95 | 1.04 | 0.772 | 0.81 | 0.83 | 0.85 | 0.91 | 0.93 | 0.89 | 0.87 |
| Yb | 5.46 | 5.92 | 5.62 | 5.76 | 5.86 | 4.97 | 5.47 | 5.92 | 5.56 | 6.31 | 4.51 | 4.04 | 5.54 | 6.05 | 5.22 | 5.04 | 5.60 | 5.31 |
| Lu | 0.87 | 0.88 | 0.83 | 0.84 | 1.00 | 0.63 | 0.77 | 0.781 | 0.90 | 0.75 | 0.739 | 0.67 | 0.82 | 0.87 | 0.77 | 0.90 | 0.84 | 0.83 |

**LA-ICP-MS data for apatite types from Mariela**, fromPalma *et al.* (2019).

| Cl-OH | | | | | | | | | | | | | |
| --- | --- | --- | --- | --- | --- | --- | --- | --- | --- | --- | --- | --- | --- |
| 364 | 344 | 351 | 339 | 381 | 356 | 360 | 370 | 369 | 374 | 378 | 378 | 380 | 355 |
| 647 | 605 | 617 | 573 | 660 | 675 | 638 | 642 | 652 | 633 | 666 | 648 | 653 | 603 |
| 56.8 | 52.5 | 54.4 | 50.1 | 56.7 | 53.3 | 53.8 | 55.3 | 56.4 | 56.0 | 59.4 | 56.0 | 55.0 | 52.8 |
| 185 | 181 | 180.6 | 172 | 195 | 175 | 182 | 179 | 184 | 184 | 194 | 192 | 184 | 171 |
| 25.2 | 23.2 | 25.2 | 24.4 | 25.7 | 23.5 | 24.2 | 24.4 | 23.4 | 25.0 | 24.8 | 25.9 | 23.7 | 23.8 |
| 3.52 | 3.01 | 2.88 | 3.40 | 3.02 | 3.00 | 3.42 | 3.41 | 3.30 | 3.48 | 3.30 | 3.57 | 3.43 | 3.21 |
| 25.7 | 24.0 | 24.3 | 22.3 | 25.5 | 22.5 | 23.5 | 23.5 | 24.4 | 24.0 | 23.4 | 23.7 | 24.0 | 23.3 |
| 3.00 | 2.66 | 2.84 | 2.65 | 2.99 | 2.54 | 2.80 | 2.75 | 2.84 | 2.63 | 2.73 | 2.71 | 2.56 | 2.70 |
| 14.8 | 13.7 | 14.8 | 12.6 | 16.2 | 12.4 | 14.6 | 14.72 | 14.3 | 14.4 | 14.2 | 14.0 | 12.9 | 13.8 |
| 2.99 | 2.85 | 3.09 | 3.16 | 3.16 | 2.56 | 3.06 | 2.87 | 3.03 | 3.05 | 3.12 | 3.03 | 3.01 | 2.99 |
| 8.34 | 7.53 | 8.23 | 7.24 | 7.66 | 7.32 | 7.76 | 8.00 | 7.87 | 8.02 | 7.66 | 7.96 | 7.52 | 7.96 |
| 0.98 | 0.88 | 0.91 | 0.76 | 0.95 | 0.75 | 0.87 | 0.89 | 0.93 | 0.98 | 1.03 | 0.91 | 0.91 | 0.93 |
| 5.69 | 5.51 | 5.70 | 5.16 | 5.96 | 5.0 | 5.25 | 5.25 | 5.91 | 5.73 | 5.89 | 5.86 | 5.48 | 5.67 |
| 0.98 | 0.88 | 0.78 | 0.71 | 0.91 | 0.81 | 0.84 | 0.84 | 0.92 | 0.97 | 0.80 | 0.85 | 0.90 | 0.87 |

**Supp. Table 7** Age relation of different minerals in four different IOA deposits

| Ore deposits and dating method | age | error | Interpretations | # | References |
| --- | --- | --- | --- | --- | --- |
| Kiruna, Northern Sweden |  |  |  |  |  |
| Zircon U-Pb | 1880 | 3 | hanging wall | 1 | Westhues *et al.* (2016) |
| Zircon U-Pb | 1884 | 4 | foot wall | 2 |
| Zircon U-Pb | 1880 | 3 | dyking cutting ore | 3 | Cliff *et al.* (1990) |
| Monazite U-Pb | 1628 | 12 | post ore event | 4 | Andersson *et al.* (2016); and  Westhues *et al.* (2017) |
| Monazite U-Pb | 1738 | 19 | post ore event | 5 |
| Pea Ridge mine, America |  |  |  |  |  |
| Zircon U-Pb | 1473.6 | 8 | host rhyolite | 1 | Aleinikoff *et al.* (2016) |
| Apatite U-Pb | 1474 | 14 | Ore-stage age | 2 | Neymark *et al.* (2016) |
| Apatite U-Pb | 1452.2 | 5.4 | Post ore event | 3 |
| Monazite U-Pb | 1441 | 3.8 | Post ore event | 4 |
| Monazite U-Pb | 1377 | 24 | Post ore event | 5 |
| Cheever mine at Adirondacks districts, America | | |  |  |  |
| Zircon U-Pb | 1040 | 11 | Host rocks | 1 | Chiarenzelli *et al.* (2018) |
| Zirocon U-Pb | 1033.6 | 2.9 | Ore-timing | 2 |
| Apatite U-Pb | 1009 | 13 | post ore event | 3 | Chew *et al.* (2011) |
| Monazite (EPMA U-Th- total Pb) | 980 | 6 | post ore event | 4 | Regan *et al.* (2019) |
| Bafq area, Iran |  |  |  |  |  |
| Zircon U-Pb | 528.2 |  | Basal rhyodacite flow  of host rocks units | 1 | Ramezani & Tucker (2003) |
| Apatite free of mineral inclusions (U-Pb) | 527-539 | / | Ore | 2 | Stosch *et al.* (2010) |
| Monazite (EPMA U-Th- total Pb)* | 515-529 | / | forming at ore-stage? | 3 | Torab & Lehmann (2007) |
| Monazite/xenotime inclusions in apatite (U-Pb) | 440 | / | post ore event | 4 | Stosch *et al.* (2010) |
| Monazite/xenotime inclusions in apatite (U-Pb) | 130-140 | / | post ore event | 5 |

*515±21 or 529±21 Ma monazite, depending on whether initial lead was assumed to be present or absent, shown as 519-529 Ma in Figure 9d.

**References for ESM materials:**

Aleinikoff, J.N., Selby, D., Slack, J.F., Day, W.C., Pillers, R.M., Cosca, M.A., Seeger, C.M., Fanning, C.M., and Samson, I.M., 2016, U-Pb, Re-Os, and Ar/Ar Geochronology of Rare Earth Element (REE)-Rich Breccia Pipes and Associated Host Rocks from the Mesoproterozoic Pea Ridge Fe-REE-Au Deposit, St. Francois Mountains, Missouri, Economic Geology, 111, 1883-1914

Andersson, U.B., Harlov, D.E., Förster, H.J., Nyström, J.O., Dulski, P., and Broman, C., 2002, On the origin of monazite inclusions in apatite from the Kiruna iron ores, GFF, 124, 232-233

Andersson, U.B., Zack, T., Aupers, K., Blomgren, H., Hogmalm, J., Schulz, B., and Krause, J., 2016, Ages of hydrothermal overprints in the Kiruna iron oxideapatite ores as recorded in secondary monazite and xenotime, 35th International Geological Congress, At: Cape Town, Paper Nr. 3431.

Ayuso, R.A., Slack, J.F., Day, W.C., and McCafferty, A.E., 2016, Geochemistry, Nd-Pb Isotopes, and Pb-Pb Ages of the Mesoproterozoic Pea Ridge Iron Oxide-Apatite–Rare Earth Element Deposit, Southeast Missouri, Economic Geology, 111, 1935–1962

Bain, W.M., Steele-MacInnis, M., Li, K., Li, L., Mazdab, F.K., and Marsh, E.E., 2020, A fundamental role of carbonate–sulfate melts in the formation of iron oxide–apatite deposits, Nature Geoscience, 13, 751-757

Bonyadi, Z., Davidson, G.J., Mehrabi, B., Meffre, S., and Ghazban, F., 2011, Significance of apatite REE depletion and monazite inclusions in the brecciated Se–Chahun iron oxide–apatite deposit, Bafq district, Iran: Insights from paragenesis and geochemistry, Chemical Geology, 281, 253-269

Chai, F., Yang, F., Liu, F., Santosh, M., Geng, X., Li, Q., and Liu, G., 2014, The Abagong apatite-rich magnetite deposit in the Chinese Altay Orogenic Belt: A Kiruna-type iron deposit, Ore Geology Reviews, 57, 482-497

Chew, D.M., Sylvester, P.J., and Tubrett, M.N., 2011, U–Pb and Th–Pb dating of apatite by LA-ICPMS, Chemical Geology, 280, 200-216

Chiarenzelli, J., Lupulescu, M., Regan, S., and Singer, J., 2018, Age and Origin of the Mesoproterozoic Iron Oxide-Apatite Mineralization, Cheever Mine, Eastern Adirondacks, NY, Geosciences, 8, 345-367

Cliff, R.A., Rickard, D., and Blake, K., 1990, Isotope Systematics of the Kiruna Magnetite Ores, Sweden: Part 1. Age of the Ore, Economic Geology, 85, 1770-1776

Harlov, D.E., Andersson, U.B., Förster, H.-J., Nyström, J.O., Dulski, P., and Broman, C., 2002, Apatite–monazite relations in the Kiirunavaara magnetite–apatite ore, northern Sweden, Chemical Geology, 191, 47-72

Harlov, D.E., Meighan, C.J., Kerr, I.D., and Samson, I.M., 2016, Mineralogy, Chemistry, and Fluid-Aided Evolution of the Pea Ridge Fe Oxide-(Y plus REE) Deposit, Southeast Missouri, USA, Economic Geology, 111, 1963-1984

Heidarian, H., Alirezaei, S., and Lentz, D.R., 2017, Chadormalu Kiruna-type magnetite-apatite deposit, Bafq district, Iran: Insights into hydrothermal alteration and petrogenesis from geochemical, fluid inclusion, and sulfur isotope data, Ore Geology Reviews, 83, 43-62

Hofstra, A.H., Meighan, C.J., Song, X., Samson, I., Marsh, E.E., Lowers, H.A., Emsbo, P., and Hunt, A.G., 2016, Mineral Thermometry and Fluid Inclusion Studies of the Pea Ridge Iron Oxide-Apatite–Rare Earth Element Deposit, Mesoproterozoic St. Francois Mountains Terrane, Southeast Missouri, USA, Economic Geology, 111, 1985–2016

Hoshino, M., Watanabe, Y., and Kon, Y., 2017, Implication of Apatite and Anhydrite for Formation of an Iron-Oxide-Apatite(IOA) Rare Earth Element Prospect, Benjamin River, Canada, Resource Geology, 67, 361-383

Jonsson, E., Harlov, D.E., MaJka, J., Högdahl, K., and Persson-Nilsson, K., 2016, Fluorapatite-monazite-allanite relations in the Grängesberg apatite-iron oxide ore district, Bergslagen, Sweden, American Mineralogist, 101, 1769-1782

Li, W., Audétat, A., and Zhang, J., 2015, The role of evaporites in the formation of magnetite–apatite deposits along the Middle and Lower Yangtze River, China: Evidence from LA-ICP-MS analysis of fluid inclusions, Ore Geology Reviews, 67, 264-278

Lledo, H.L., 2005, Experiment studies on the origin of iron deposits; and mineralization of Sierra La Bandera, Chile, Phd. Thesis,

Majka, J., Jonsson, E., Högdahl, K., Troll, V.R., Harlov, D.E., and Nilsson, K.P., 2013, Textural relations and mineral chemistry of REE in the Grängesberg apatite-iron oxide deposit, Sweden: the role of fluids, 12th Biennial SGA Meeting, Mineral deposit research for a high-tech world, 1728-1731

Martinsson, O., Billström, K., Broman, C., Weihed, P., and Wanhainen, C., 2016, Metallogeny of the Northern Norrbotten Ore Province, northern Fennoscandian Shield with emphasis on IOCG and apatite-iron ore deposits, Ore Geology Reviews, 78, 447-492

Mehdipour Ghazi, J., Harris, C., Rahgoshay, M., and Moazzen, M., 2019, Combined igneous and hydrothermal source for the Kiruna-type Bafq magnetite-apatite deposit in Central Iran; trace element and oxygen isotope studies of magnetite, Ore Geology Reviews, 105, 590-604

Mokhtari, M.A.A., Sadeghi, M., and Nabatian, G., 2018, Geochemistry and potential resource of rare earth element in the IOA deposits of Tarom area, NW Iran, Ore Geology Reviews, 92, 529-541

Nabatian, G., Ghaderi, M., Corfu, F., Neubauer, F., Bernroider, M., Prokofiev, V., and Honarmand, M., 2013, Geology, alteration, age, and origin of iron oxide–apatite deposits in Upper Eocene quartz monzonite, Zanjan district, NW Iran, Mineralium Deposita, 49, 217-234

Neymark, L.A., Holm-Denoma, C.S., Pietruszka, A.J., Aleinikoff, J.N., Fanning, C.M., Pillers, R.M., and Moscati, R.J., 2016, High Spatial Resolution U-Pb Geochronology and Pb Isotope Geochemistry of Magnetite-Apatite Ore from the Pea Ridge Iron Oxide-Apatite Deposit, St. Francois Mountains, Southeast Missouri, USA, Economic Geology, 111, 1915-1933

Niiranen, K., and Rutanen, H., 2019, Gangue mineralogy of titanium (Ti) in the Kiirunavaara iron ore deposit, northern Sweden, Conf. Iron Ore, Perth, Australia, July 22-24 2019, Proceedings, 483-491

Ootes, L., Snyder, D., Davis, W.J., Acosta-Gongora, P., Corriveau, L., Mumin, A.H., Gleeson, S.A., Samson, I.M., Montreuil, J.F., Potter, E., and Jackson, V.A., 2017, A Paleoproterozoic Andean-type iron oxide copper-gold environment, the Great Bear magmatic zone, Northwest Canada, Ore Geology Reviews, 81, 123-139

Palma, G., Barra, F., Reich, M., Valencia, V., Simon, A.C., Vervoort, J., Leisen, M., and Romero, R., 2019, Halogens, trace element concentrations, and Sr-Nd isotopes in apatite from iron oxide-apatite (IOA) deposits in the Chilean iron belt: Evidence for magmatic and hydrothermal stages of mineralization, Geochimica et Cosmochimica Acta, 246, 515-540

Ramezani, J., and Tucker, R.D., 2003, The Saghand Region, Central Iran: U-Pb Geochronology, Petrogenesis and Implications for Gondwana Tectonics, American Journal of Science, 303, 622–665

Regan, S., Lupulescu, M., Jercinovic, M., Chiarenzelli, J., Williams, M., Singer, J., and Bailey, D., 2019, Age and Origin of Monazite Symplectite in an Iron Oxide-Apatite Deposit in the Adirondack Mountains, New York, USA: Implications for Tracking Fluid Conditions, Minerals, 9

Schmidt, M.W., Connolly, J.A., Gunther, D., and Bogaerts, M., 2006, Element partitioning: the role of melt structure and composition, Science, 312, 1646-1650

Stosch, H.-G., Romer, R.L., Daliran, F., and Rhede, D., 2010, Uranium–lead ages of apatite from iron oxide ores of the Bafq District, East-Central Iran, Mineralium Deposita, 46, 9-21

Taghipour, S., Kananian, A., Harlov, D., and Oberhansli, R., 2015, Kiruna-Type Iron Oxide-Apatite Deposits, Bafq District, Central Iran: Fluid-Aided Genesis of Fluorapatite-Monazite-Xenotime Assemblages, Canadian Mineralogist, 53, 479-495

Torab, F.M., and Lehmann, B., 2007, Magnetite-apatite deposits of the Bafq district, Central Iran: apatite geochemistry and monazite geochronology, Mineralogical Magazine, 71, 347-363

Tornos, F., Velasco, F., and Hanchar, J.M., 2017, The Magmatic to Magmatic-Hydrothermal Evolution of the El Laco Deposit (Chile) and Its Implications for the Genesis of Magnetite-Apatite Deposits, Economic Geology, 112, 1595-1628

Veksler, I.V., Dorfman, A.M., Danyushevsky, L.V., Jakobsen, J.K., and Dingwell, D.B., 2006, Immiscible silicate liquid partition coefficients: implications for crystal-melt element partitioning and basalt petrogenesis, Contributions to Mineralogy and Petrology, 152, 685-702

Westhues, A., Hanchar, J.M., Voisey, C.R., Whitehouse, M.J., Rossman, G.R., and Wirth, R., 2017, Tracing the fluid evolution of the Kiruna iron oxide apatite deposits using zircon, monazite, and whole rock trace elements and isotopic studies, Chemical Geology, 466, 303-322

Westhues, A., Hanchar, J.M., Whitehouse, M.J., and Martinsson, O., 2016, New Constraints on the Timing of Host-Rock Emplacement, Hydrothermal Alteration, and Iron Oxide-Apatite Mineralization in the Kiruna District, Norrbotten, Sweden, Economic Geology, 111, 1595-1618

Yu, J., Mao, J., and Zhang, C., 2008, The possible contribution of a mantle-derived fluid to the Ningwu porphyry iron deposits – Evidence from carbon and strontium isotopes of apatites, Progress in Natural Science, 18, 167-172

Zeng, L.-P., Zhao, X.-F., Li, X.-C., Hu, H., and McFarlane, C., 2016, In situ elemental and isotopic analysis of fluorapatite from the Taocun magnetite-apatite deposit, Eastern China: Constraints on fluid metasomatism, American Mineralogist, 101, 2468-2483
